# Supplementary material for: A mesoporous C,N-co doped Co-based phosphate ultrathin nanosheet derived from a phosphonate-based-MOF as an efficient electrocatalyst for water oxidation
Source: Royal Society of Chemistry journal article supplement (doi:10.1039/c9cy00973f), 2019-01-01
Supplement: c9cy00973f1.pdf [file c9cy00973f1.pdf]

## **Electronic Supplementary Material (ESI)**

**A mesoporous C,N-co doped Co-based phosphate ultrathin nanosheet derived from phosphonate-based-MOF as an efficient electrocatalyst for water oxidation**

Zhao-Qian Huang, Wen-Xiu Lu, Bin Wang, Wei-Jun Chen, Jie-Ling Xie, Dong-Sheng Pan, Ling-Li Zhou and Jun-Ling Song\*

Table S1 Comparison of the OER catalytic performance of the other recently reported MOFs derived electrocatalysts supported on glass carbon in different media.

| Catalyst                                                | Substrate | Electrolyte                                       | Overpotential at<br>10/-10 mA/cm <sup>2</sup><br>(mV vs.RHE) | Tafel<br>slope<br>(mV<br>dec <sup>-1</sup> ) | Reference                                                        |
|---------------------------------------------------------|-----------|---------------------------------------------------|--------------------------------------------------------------|----------------------------------------------|------------------------------------------------------------------|
| CoNi-P-3DHFLMs                                          | GC        | 1 M KOH                                           | 292                                                          | 84                                           | <i>Applied Catalysis B: Environmental</i> <b>2019</b> , 249, 147 |
| Co <sub>3</sub> O <sub>4</sub> /MoS <sub>2</sub>        | NF        | 1 M KOH                                           | 230 ( $j=20$<br>mA/cm <sup>2</sup> )<br>205                  | 94<br>128                                    | <i>Applied Catalysis B: Environmental</i> <b>2019</b> , 248, 202 |
| FeNi@N-CNT                                              | GC        | 1 M KOH                                           | 300                                                          | 47.7                                         | <i>ACS Appl. Mater. Interfaces</i> <b>2016</b> , 8, 35390        |
| S-CoWP@(S,N)-C                                          | GC        | 1 M KOH                                           | 420<br>-67                                                   | 68<br>35                                     | <i>ACS Energy Lett.</i> <b>2018</b> , 3, 1434                    |
| (Co,Ni)Se <sub>2</sub> @NiFe LDH                        | GC        | 0.1 M KOH                                         | 277                                                          | 75                                           | <i>ACS Appl. Mater. Interfaces</i> <b>2019</b> , 11, 8106        |
| Ni <sub>2</sub> P-CoP                                   | GC        | 0.1 M KOH<br>0.5 M H <sub>2</sub> SO <sub>4</sub> | 320<br>105                                                   | 69<br>64                                     | <i>ACS Appl. Mater. Interfaces</i> <b>2017</b> , 9, 23222        |
| Co-N-C NN-800                                           | GC        | 0.1 M KOH                                         | 470                                                          | 191                                          | <i>ACS Appl. Energy Mater.</i> <b>2018</b> , 1, 1060             |
| (Ni <sub>0.62</sub> Fe <sub>0.38</sub> ) <sub>2</sub> P | GC        | 1 M KOH                                           | 290                                                          | 44                                           | <i>Catal. Sci. Technol.</i> , <b>2017</b> , 7, 1549              |
| CeO <sub>x</sub> /CoS@L-CeO <sub>2</sub> NRs            | GC        | 1 M KOH                                           | 238                                                          | 42                                           | <i>J. Mater. Chem. A</i> , <b>2019</b> , 7, 8284                 |
| Co <sub>3</sub> O <sub>4</sub> /CoMoO <sub>4</sub> -50  | GC        | 1 M KOH                                           | 318                                                          | 63                                           | <i>J. Mater. Chem. A</i> , <b>2018</b> , 6, 1639                 |
| Mn-CoP                                                  | GC        | 1 M KOH<br>1 M KOH                                | 356<br>195                                                   | 76<br>85                                     | <i>Dalton Trans.</i> , <b>2018</b> , 47, 14679                   |
| FeCo-P/C                                                | GC        | 1 M KOH                                           | 362                                                          | 50.1                                         | <i>Small Methods</i> <b>2018</b> , 2, 1800214                    |
| NGO/Ni <sub>7</sub> S <sub>6</sub>                      | GC        | 0.1 M KOH                                         | 380<br>370                                                   | 45<br>145.5                                  | <i>Adv. Funct. Mater.</i> <b>2017</b> , 27, 1700451              |
| Co <sub>9</sub> S <sub>8</sub> @TDC-900                 | GC        | 1 M KOH                                           | 330                                                          | 86                                           | <i>J. Mater. Chem. A</i> , <b>2019</b> , 7, 7389                 |
| Fe <sub>3</sub> C@NCNT/NPC                              | GC        | 1 M KOH                                           | 369                                                          | 62                                           | <i>Catal. Sci. Technol.</i> , <b>2016</b> , 6, 6365              |
| Co <sub>3</sub> O <sub>4</sub> @C-MWCNTs                | GC        | 1 M KOH                                           | 320                                                          | 62                                           | <i>J. Mater. Chem. A</i> , <b>2015</b> , 3, 17392                |
| Co/Co <sub>9</sub> S <sub>8</sub> @NSOC-800             | GC        | 1 M KOH                                           | 373<br>216                                                   | 80<br>/                                      | <i>Chem. Commun.</i> , <b>2019</b> , 55, 3203                    |
| Co <sub>3</sub> O <sub>4</sub> @Co/NCNT                 | GC        | 0.1 M KOH                                         | 380                                                          | 58.7                                         | <i>Chem. Eur. J.</i> <b>2017</b> , 23, 18049                     |
| ZnCoNC-0.1                                              | GC        | 0.1 M KOH                                         | 520                                                          | 129                                          | <i>Nano Res.</i> <b>2018</b> , 11(1): 163                        |
| Co <sub>9</sub> S <sub>8</sub> @CT-800                  | GC        | 0.1 M KOH                                         | 390                                                          | 72                                           | <i>J. Mater. Chem. A</i> , <b>2018</b> , 6, 5935                 |

|                                                                         |    |                                      |       |      |                                                            |
|-------------------------------------------------------------------------|----|--------------------------------------|-------|------|------------------------------------------------------------|
| Co <sub>4</sub> Ni <sub>1</sub> P NTs                                   | GC | 1 M KOH                              | 245   | 61   | <i>Adv. Funct. Mater.</i> <b>2017</b> , <i>27</i> ,        |
|                                                                         |    |                                      | 129   | 52   | 1703455                                                    |
| Co/Ni@C                                                                 | GC | 0.1 M KOH                            | 440   | 93   | <i>ACS Appl. Energy Mater.</i> <b>2019</b> , <i>2</i> ,    |
|                                                                         |    |                                      |       |      | 1854                                                       |
| CoP <sub>3</sub> CPs/CFP                                                | GC | 1 M KOH                              | 343   | 76   | <i>Phys. Chem. Chem. Phys.</i> , <b>2017</b> , <i>19</i> , |
|                                                                         |    | 0.5 M H <sub>2</sub> SO <sub>4</sub> | -78   | 53   | 2104                                                       |
| Co <sub>9</sub> S <sub>8</sub> /NSCNFs-850                              | GC | 1 M KOH                              | 302   | 54   | <i>Small</i> <b>2018</b> , <i>14</i> , 1704035             |
| CoO <sub>x</sub> -MoC/NC-2                                              | GC | 1 M KOH                              | 330   | 89   | <i>Small</i> <b>2017</b> , <i>13</i> , 1702753             |
| H3LCoCN800                                                              | GC | 1 M KOH                              | 267   | 64   | <i>ACS Catal.</i> <b>2017</b> , <i>7</i> , 6000            |
|                                                                         | NF |                                      | 215   | 61   |                                                            |
| ZIF-8-C6                                                                | GC | 0.1 M KOH                            | 476   | 78.5 | <i>Mater. Chem. Front.</i> , <b>2018</b> , <i>2</i> , 102  |
|                                                                         |    | 0.5 M H <sub>2</sub> SO <sub>4</sub> | 155   | 54.7 |                                                            |
| porous Ni <sub>2</sub> P                                                | GC | 1 M KOH                              | 320   | 165  | <i>J. Mater. Chem. A</i> , <b>2018</b> , <i>6</i> , 18720  |
|                                                                         |    |                                      | 168   | 63   |                                                            |
| Co <sub>2</sub> P/Mo <sub>2</sub> C/Mo <sub>3</sub> Co <sub>3</sub> C@C | GC | 1 M KOH                              | 362   | 82   | <i>J. Mater. Chem. A</i> , <b>2018</b> , <i>6</i> , 5789   |
|                                                                         |    |                                      | 182   | 68   |                                                            |
| (Ni,Co)Se <sub>2</sub>                                                  | GC | 1 M KOH                              | 256   | 74   | <i>Nanoscale</i> , <b>2019</b> , <i>11</i> , 6401          |
| Ni@NC-800                                                               | GC | 1 M KOH                              | 280   | 45   | <i>Adv. Mater.</i> <b>2017</b> , <i>29</i> , 1605957       |
|                                                                         |    |                                      | 205   | 160  |                                                            |
| Co-NC/CNT                                                               | GC | 1 M KOH                              | 354   | 78   | <i>J. Mater. Chem. A</i> , <b>2016</b> , <i>4</i> , 16057  |
|                                                                         |    |                                      | 203   | 125  |                                                            |
| 14.6 % CeO <sub>x</sub> /CoS                                            | GC | 1 M KOH                              | 269   | 50   | <i>Angew. Chem. Int. Ed.</i> <b>2018</b> , <i>57</i> ,     |
|                                                                         |    |                                      |       |      | 8654                                                       |
| CoSe <sub>2</sub> -450                                                  | GC | 1 M KOH                              | 330   | 79   | <i>J. Mater. Chem. A</i> , <b>2017</b> , <i>5</i> , 15310  |
| C-MOF-C2-900                                                            | GC | 0.1 M KOH                            | 350   | 79   | <i>Adv. Mater.</i> <b>2018</b> , <i>30</i> , 1705431       |
| Py-1@SNC600                                                             | GC | 1 M KOH                              | 284.7 | 56   | <i>Small</i> <b>2019</b> , <i>15</i> , 1900348             |
| Co-CNT/PC                                                               | GC | 0.1 M KOH                            | 315   | 73.8 | <i>Chem. Commun.</i> , <b>2016</b> , <i>52</i> , 9727      |
| CoSe <sub>2</sub> /CFC                                                  | GC | 1 M KOH                              | 356   | 88   | <i>ACS Appl. Mater. Interfaces</i> <b>2016</b> ,           |
|                                                                         |    |                                      |       |      | 8, 26902                                                   |
| CoNC-CNF-1000                                                           | GC | 0.1 M KOH                            | 450   | 94   | <i>Small</i> <b>2018</b> , <i>14</i> , 1800423             |
| NiCoS/Ti <sub>3</sub> C <sub>2</sub> T <sub>x</sub>                     | GC | 1 M KOH                              | 365   | 58.2 | <i>ACS Appl. Mater. Interfaces</i> <b>2018</b> ,           |
|                                                                         |    |                                      |       |      | 10, 22311                                                  |
| FeNi@NCNT                                                               | GC | 1 M KOH                              | 300   | 48   | <i>ACS Appl Mater Interfaces</i> , <b>2016</b> ,           |
|                                                                         |    |                                      |       |      | 8: 35390                                                   |
| 2D Co <sub>3</sub> O <sub>4</sub> /CBDC                                 | GC | 1 M KOH                              | 208   | 50   | <i>ACS Energy Lett</i> , <b>2018</b> , <i>3</i> : 1655     |
| CoMo-H                                                                  | GC | 1 M KOH                              | 312   | 69   | <i>Adv Funct Mater</i> , <b>2017</b> , <i>27</i> :         |
|                                                                         |    |                                      |       |      | 1702324                                                    |
| NF@NC-CoFe <sub>2</sub> O <sub>4</sub> /C NRAs                          | GC | 1 M KOH                              | 240   | 45   | <i>Adv Mater</i> , <b>2017</b> , <i>29</i> : 1604437       |
| CoSe <sub>2</sub> -450                                                  | GC | 1 M KOH                              | 330   | 79   | <i>J Mater Chem A</i> , <b>2017</b> , <i>5</i> : 15310     |
| CoTe <sub>2</sub> @NCNTFs                                               | GC | 1 M KOH                              | 330   | 83   | <i>J Mater Chem A</i> , <b>2018</b> , <i>6</i> : 3684      |
| CoP/rGO-400                                                             | GC | 1 M KOH                              | 340   | 66   | <i>Chem Sci</i> , <b>2016</b> , <i>7</i> : 1690            |
| NiCoP/C nanoboxes                                                       | GC | 1 M KOH                              | 330   | 96   | <i>Angew Chem Int Ed</i> , <b>2017</b> , <i>56</i> : 3897  |

## Experimental Section

**Calculation Method:** Details concerning the calculation of the Faraday efficiency for OER are shown below.

The turnover frequency (TOF) of the catalyst for OER is defined as

$$\text{TOF} = n_{\text{O}_2}/n_{\text{cat}}/t \quad (\text{S1})$$

where  $n_{\text{O}_2}$  is the amount of oxygen (mol) produced,  $n_{\text{cat}}$  is the amount of catalytic active centers in the catalyst (mol) and  $t$  is the electrolysis time (s).

When the electrolysis current is all used for OER,

$$\text{TOF}_{\text{theoretical}} = J/(4 \times F \times m/M) \quad (\text{S2})$$

Where  $J$  is the current density ( $\text{mA cm}^{-2}$ ) at a given overpotential,  $F$  is the faraday constant ( $96485 \text{ C mol}^{-1}$ ),  $m$  is the mass loading of the catalyst ( $\text{mg cm}^{-2}$ ), and  $M$  is the molecular weight of the catalyst unified with one active center per formula unit.

The Faraday efficiency for OER is calculated by

$$F_{\text{OER}} = \text{TOF} / \text{TOF}_{\text{theoretical}} \times 100\% \quad (\text{S3})$$

The obtained gas chromatography peak areas of  $\text{O}_2$  and  $\text{N}_2$  in the electrolytic cell are:

|              | 0 min     | 10 min    | 20 min    | 40 min    | 60 min    |
|--------------|-----------|-----------|-----------|-----------|-----------|
| $\text{O}_2$ | 2968.935  | 3065.909  | 3162.846  | 3357.463  | 3542.295  |
| $\text{N}_2$ | 13109.658 | 12895.355 | 12352.472 | 11948.066 | 11096.842 |

Giving  $n_{\text{O}_2} = \text{O}_2 \text{ concentration (\%)} \times \text{head space volume} / (22.4 \times 298 / 273) = 573.36 / 13415.4 \times 50 / 1000 / 24.45 \text{ mol} = 8.74 \times 10^{-5} \text{ mol}$ . Because  $n_{\text{cat}} = \text{mass loading (mg)} / \text{molecular weight} / 1000 = 3 \times 0.03 / 451.67 / 1000 = 1.99 \times 10^{-7} \text{ mol}$ ,  $\text{TOF} = 8.74 \times 10^{-5} / 1.99 \times 10^{-7} / 3600 = 0.122 \text{ s}^{-1}$ .

Considering all Co ions in Co-bipy-900 ( $451.67 \text{ g mol}^{-1}$ ) as catalytic centers,  $M = 451.67/3 = 150.56 \text{ g mol}^{-1}$ .  $\text{TOF}_{\text{theoretical}} = 10.0 / (4 \times 96485 \times 0.03 / 150.56) = 0.13 \text{ s}^{-1}$  for Co-bipy-900 @GC at  $10.0 \text{ mA cm}^{-2}$ .

$$F_{\text{OER}} = 0.122 \text{ s}^{-1} / 0.13 \text{ s}^{-1} \times 100 \% = 93.8 \%$$

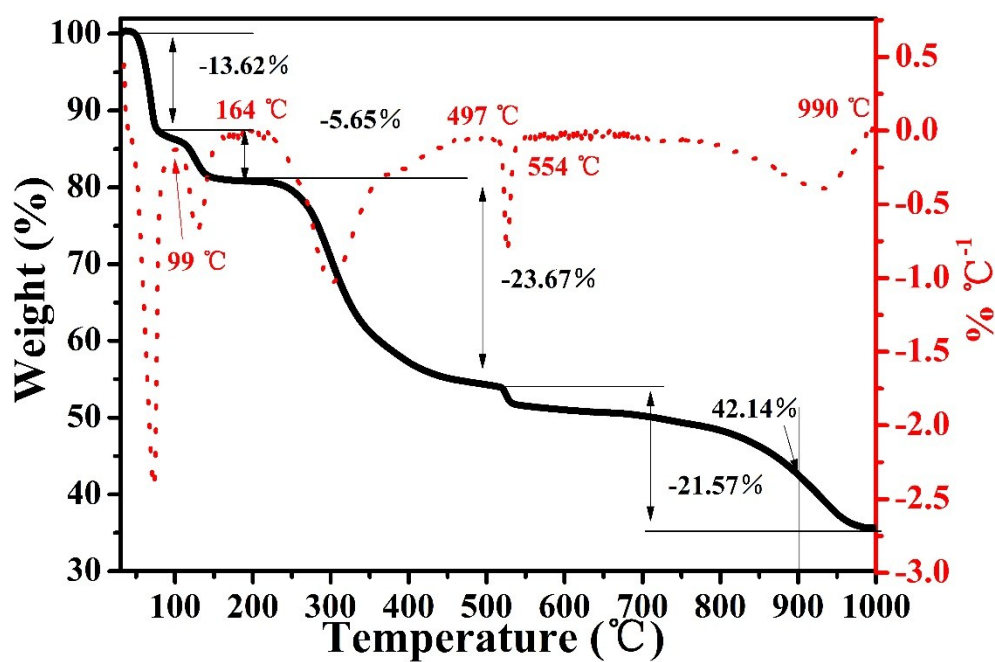

**Figure S1.** TG curves of Co-Pi-bipy.

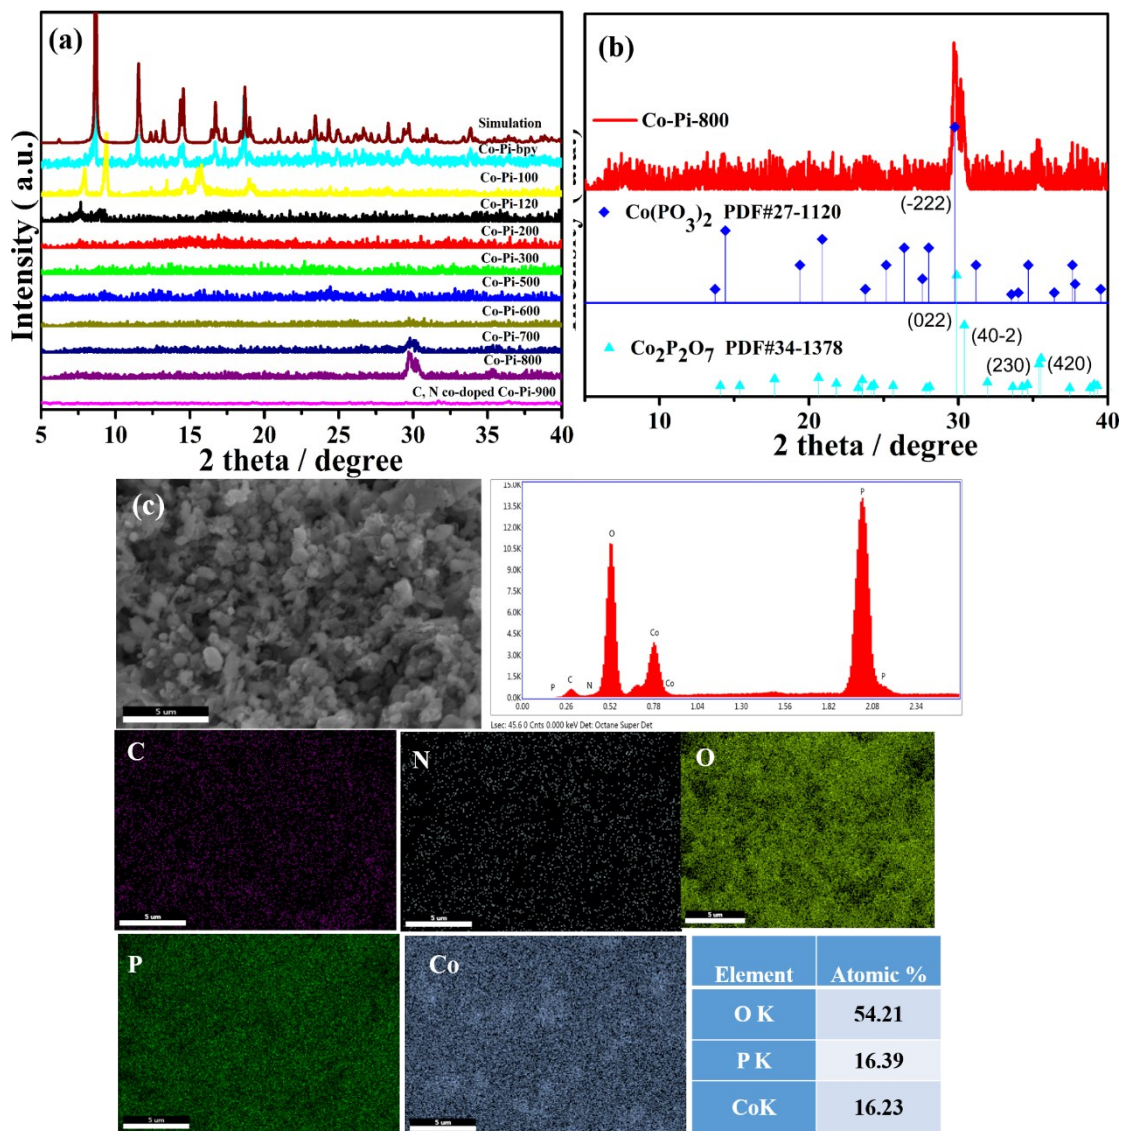

**Figure S2.** (a)XRD of different product at different TG curves of Co-Pi-bipy, denoted as Co-Pi-T (T= 120, 200, 300, 500, 600, 700, 800°C), Co-Pi-bipy and Co-Pi-900 is C,N co-doped Co-Pi-900 ), (b) XRD of Co-Pi-800, (c) EDX of Co-Pi-900.

Notes: According to TGA result as shown Figure S1, we can obtain the experimental total weight loss is 57.84% and 64.54% at 900 and 1000°C, respectively, if the final product is a mixture of  $\text{Co}(\text{PO}_3)_2$  and  $\text{Co}_2\text{P}_2\text{O}_7$  in a 1:1 molar ratio based on the composition in this MOF precursor,  $\text{Co}_3(\text{H}_2\text{L})_2(\text{H}_2\text{O})_4(\text{bipy})_2 \cdot 11\text{H}_2\text{O}$ , the calculated

total weight loss is 60.24%, if the final product is 3.0 mmol  $\text{Co}(\text{PO}_3)_2$ , the calculated total weight loss is 49.15%, while the final product is 1.5 mmol  $\text{Co}_2\text{P}_2\text{O}_7$ , the calculated total weight loss is 65.79%, thus, the experimental total weight loss is closer to that of a mixture of  $\text{Co}(\text{PO}_3)_2$  and  $\text{Co}_2\text{P}_2\text{O}_7$ . In addition, we also carried out XRD for the calcined sample at different temperature (Figure S2), it can be seen that the new diffraction peaks appear when the sample was heated to 700 °C, the two diffraction peaks at 29.9° and 31.0° could be ascribed to the  $(\bar{2}22)$  and  $(40\bar{2})$  plane of  $\text{Co}(\text{PO}_3)_2$  and  $\text{Co}_2\text{P}_2\text{O}_7$ , respectively, as shown in Figure S2b, again suggesting the formation of a mixture of  $\text{Co}(\text{PO}_3)_2$  and  $\text{Co}_2\text{P}_2\text{O}_7$ . Further, we have measured EDX to investigate the composition of the calcined material (Figure S2c). The EDX analysis of the Co-Pi-900 gave an molar ratio of Co/P/O of  $\sim 1.0:1.01:3.34$ , which is close to that calculated value of a mixture of  $\text{Co}(\text{PO}_3)_2$  and  $\text{Co}_2\text{P}_2\text{O}_7$  in a 1:1 molar ratio, and ICP analysis gave Co and P content of 41.16 wt% and 22.98 wt%, respectively, in agreement with EDX results, confirming the elemental composition for the Co-Pi-900. These results indicated that the calcined product at 900 °C might be mainly the mixture of  $\text{Co}(\text{PO}_3)_2$  and  $\text{Co}_2\text{P}_2\text{O}_7$ . We also carried out elemental analysis to find out the percentage of doped carbon and nitrogen for the sample Co-Pi-900, the results indicated that the N and C content of the final product is 0.50%, 7.01%, respectively, confirming the Co-Pi-900 catalyst was a C,N-co incorporated cobalt-based phosphate.

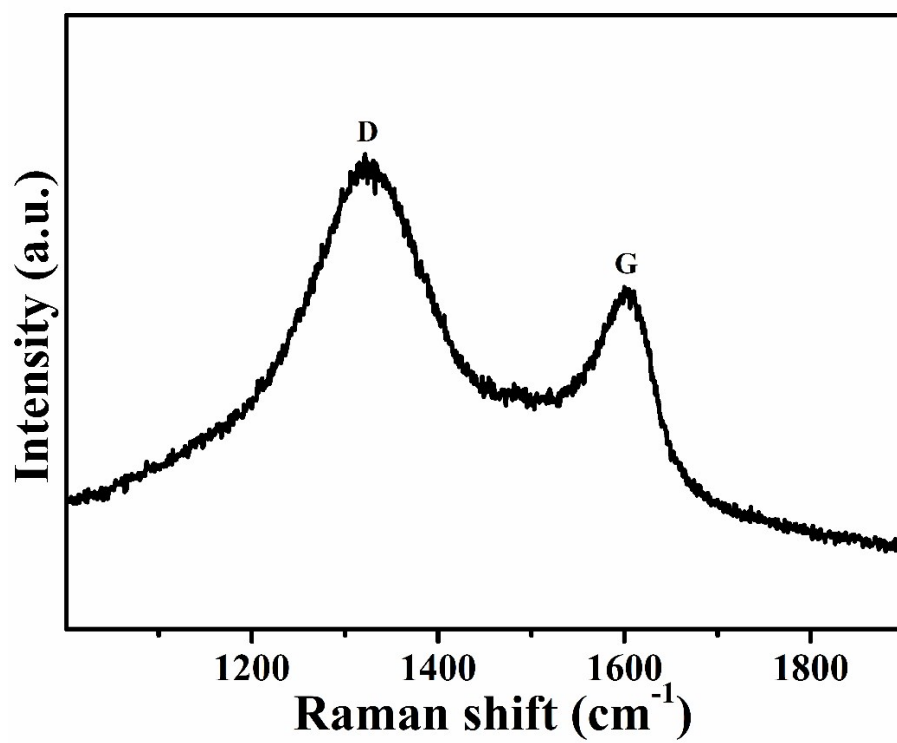

**Figure S3.** Raman spectrum of compounds Co-Pi-900.

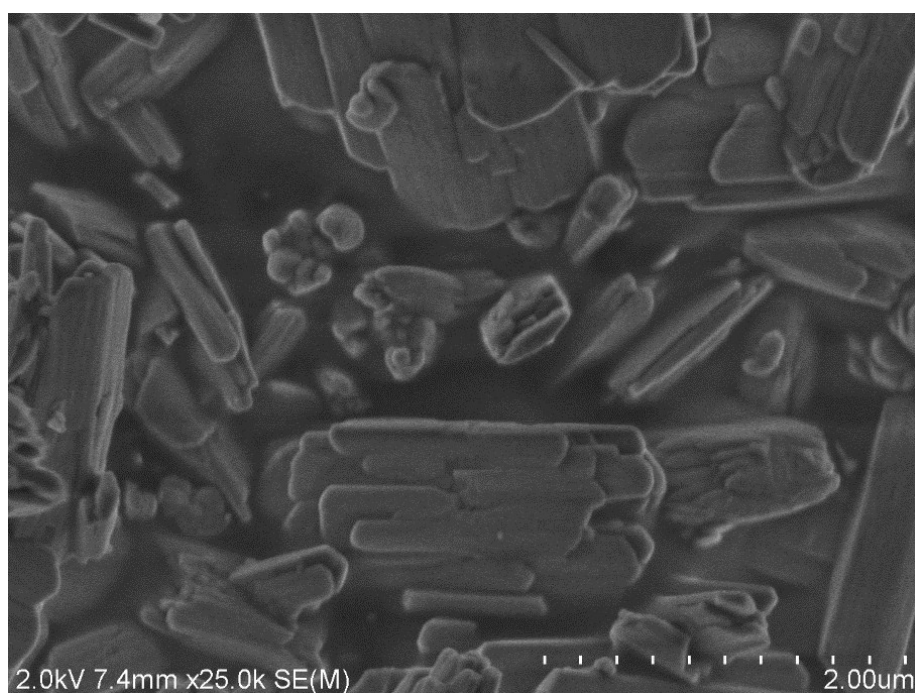

**Figure S4.** SEM images of Co-Pi-bipy.



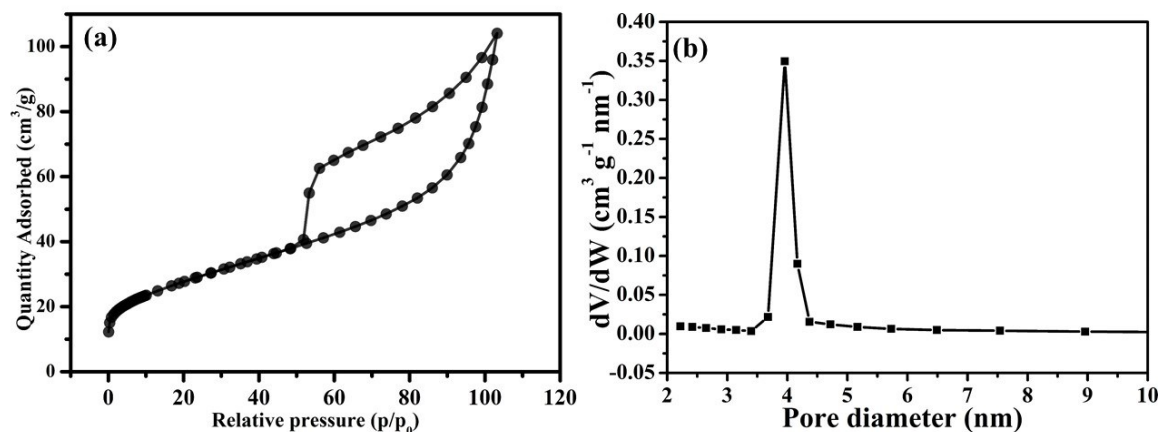

**Figure S5.** N<sub>2</sub> adsorption (solid) and desorption (open) isotherms (a) and BJH size distribution (b) of C,N co-doped Co-Pi-900, at 77.42 K.

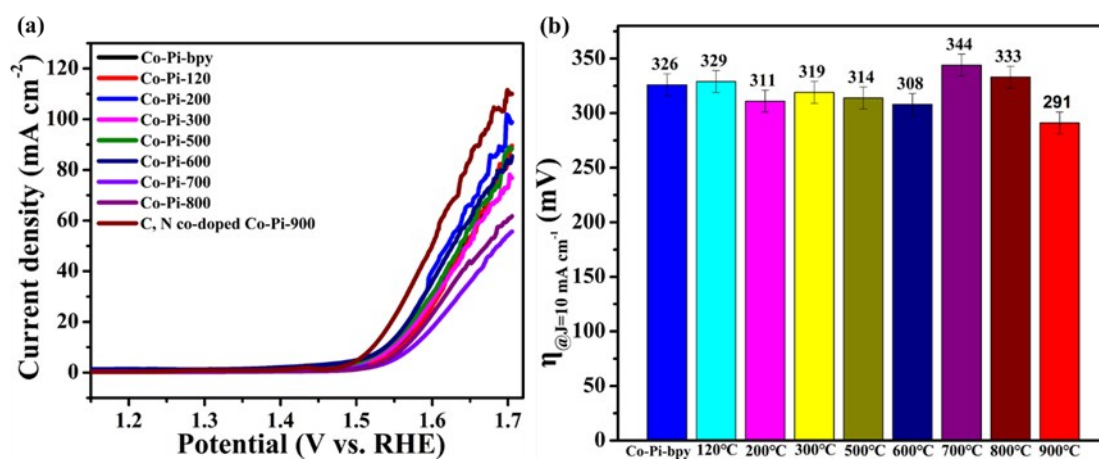

**Figure S6.** (a) LSV curves of Co-Pi-T (T= 120, 200, 300, 500, 600, 700, 800°C), Co-Pi-bipy and C,N co-doped Co-Pi-900 or Co-Pi-900) at a scan rate of 5 mV/s for the OER, (b) Comparison of the OER overpotential at a current density of 10 mA/cm<sup>2</sup> for Co-Pi-bipy-T catalysts, the error bar represents the range of results from three independent measurements.

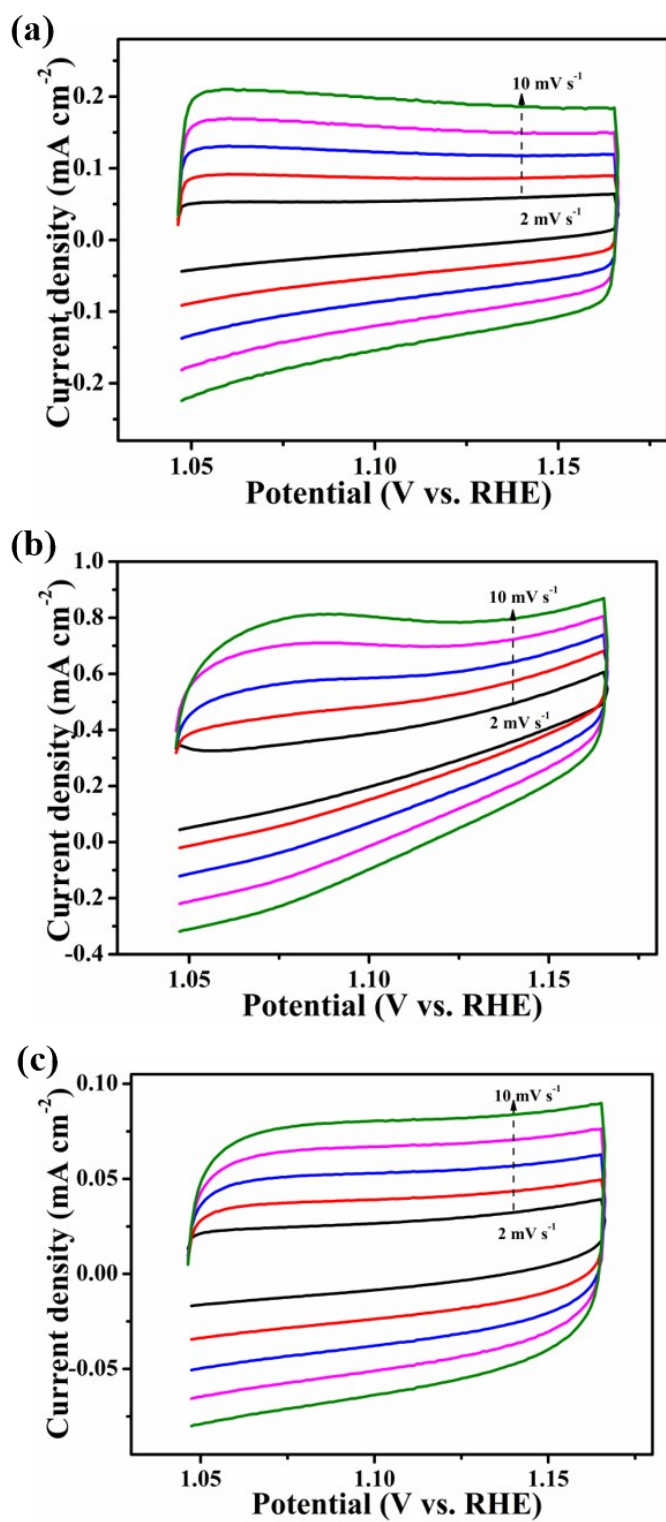

**Figure S7.** Cyclic voltammograms of (a) Co-Pi-bpy, (b) Co-Pi-900 (C,N co-doped Co-Pi-900) and (c) IrO<sub>2</sub> at different scan rates from 2 to 10 mV s<sup>-1</sup>.

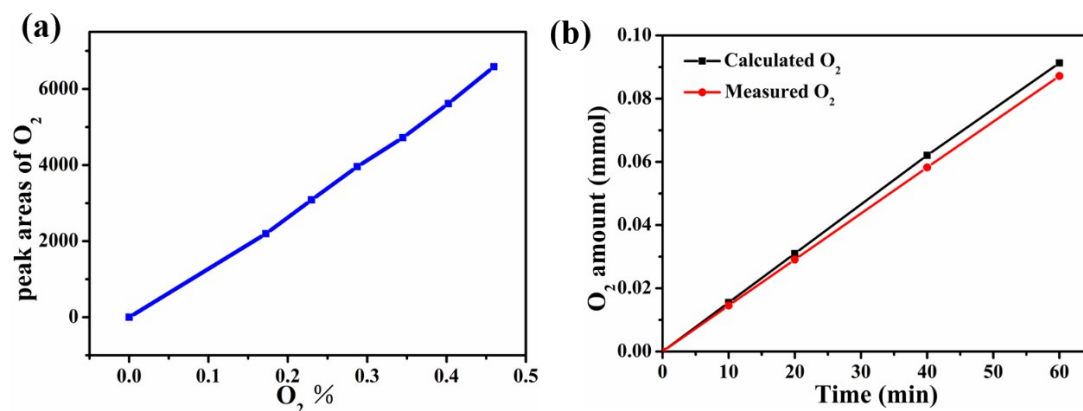

**Figure S8.** A linear relationship between seven calibrated O<sub>2</sub> concentrations and their gas chromatography peak areas was obtained (a) and the amount of O<sub>2</sub> theoretically calculated and experimentally measured versus time for the OER of Co-Pi-900 (C,N co-doped Co-Pi-900).

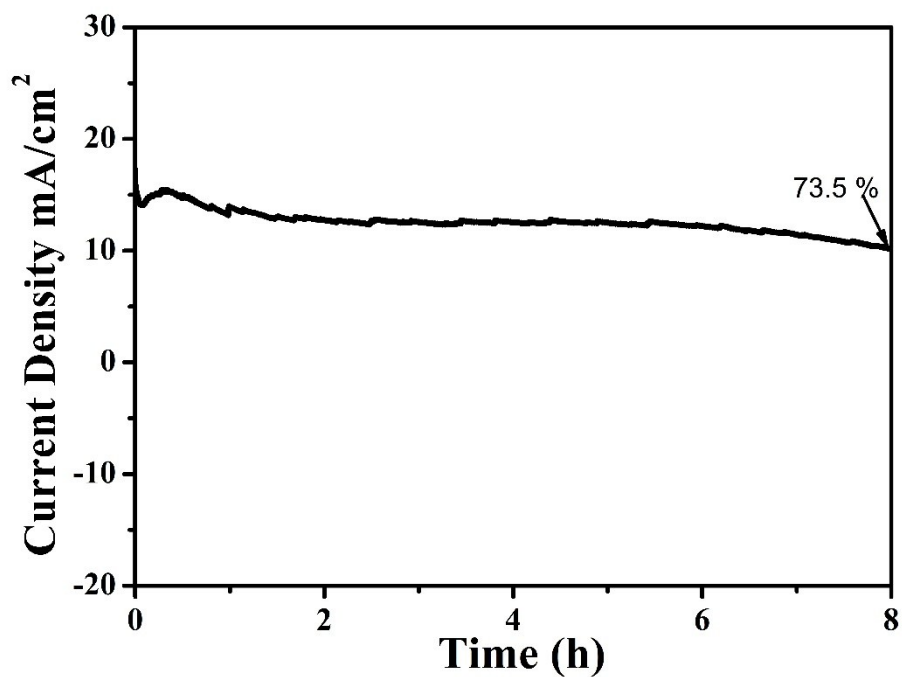

**Figure S9.** Durability test for the Co-Pi-900 (C,N co-doped Co-Pi-900) sample at 1.56 V (vs. RHE) for 8 hrs.

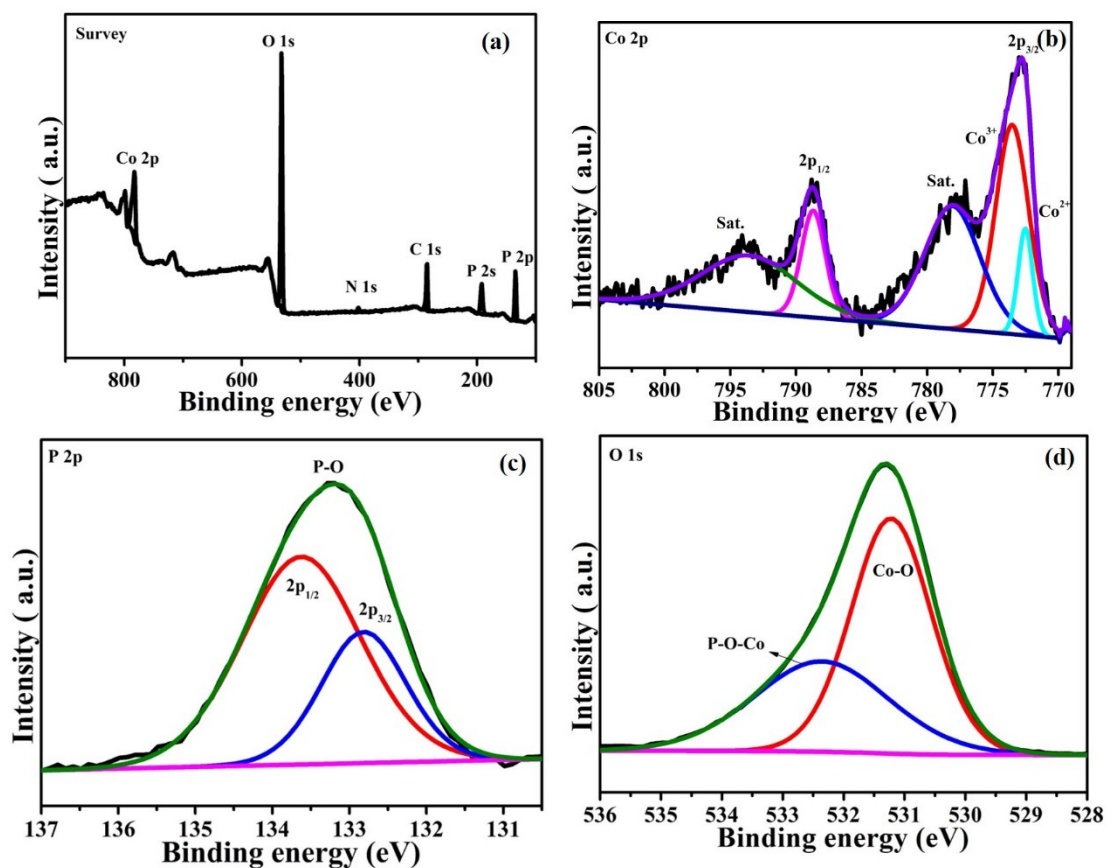

**Figure S10.** (a)XPS spectrum of Co-Pi-900 (C,N co-doped Co-Pi-900) after OER test in 1.0M KOH, (b) Co 2p, (c) P 2p and (d) O 1s.

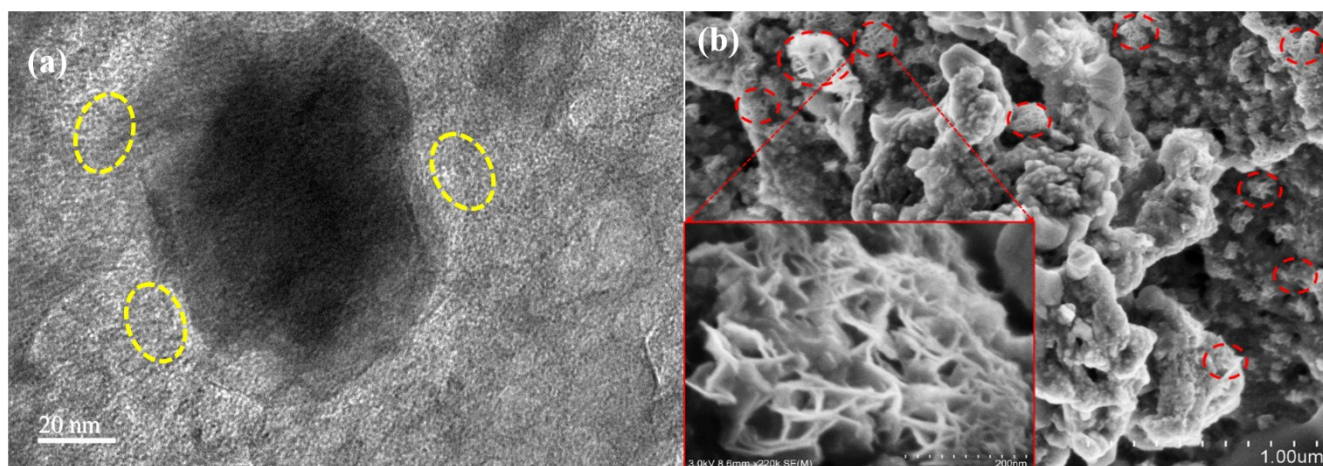

**Figure S11.** (a) TEM and (b) SEM of Co-Pi-900 (C,N co-doped Co-Pi-900) after OER test in 1.0M, pores and nanosheets are designated as yellow and red circles, respectively.

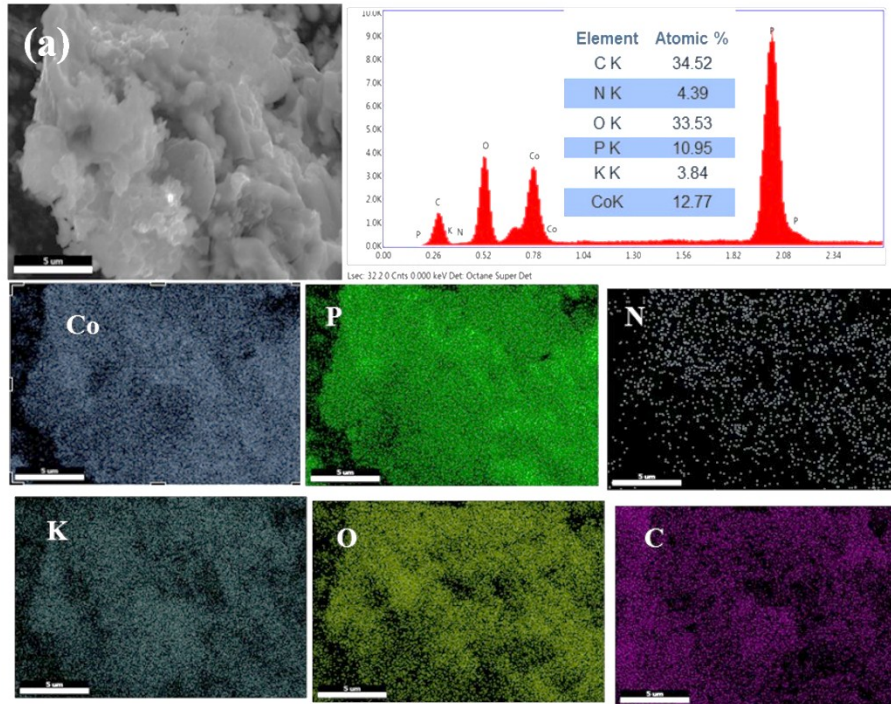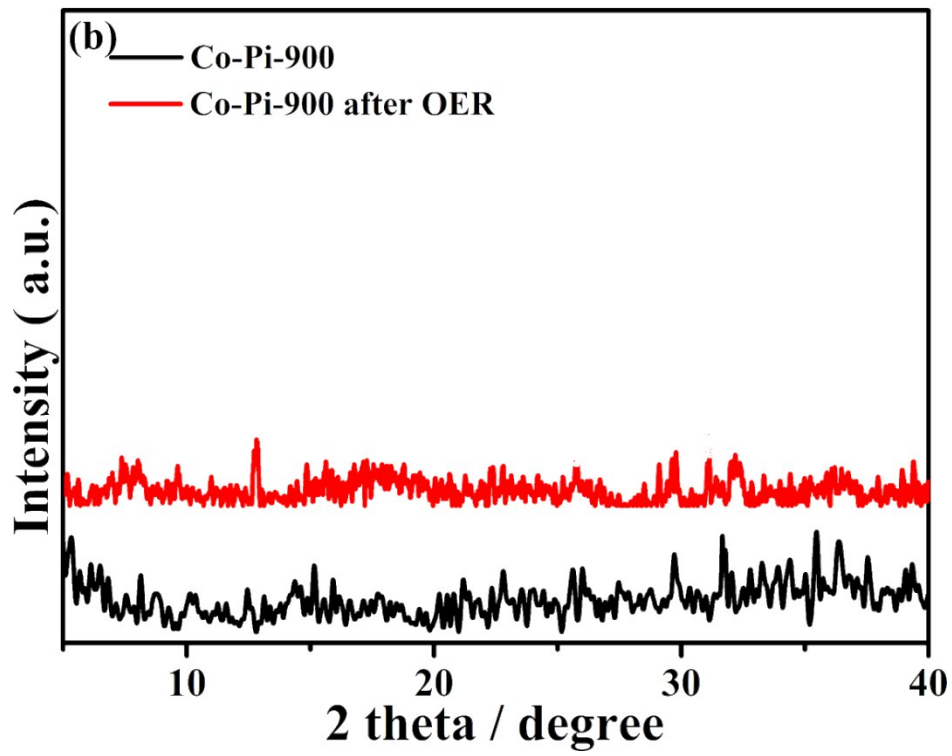

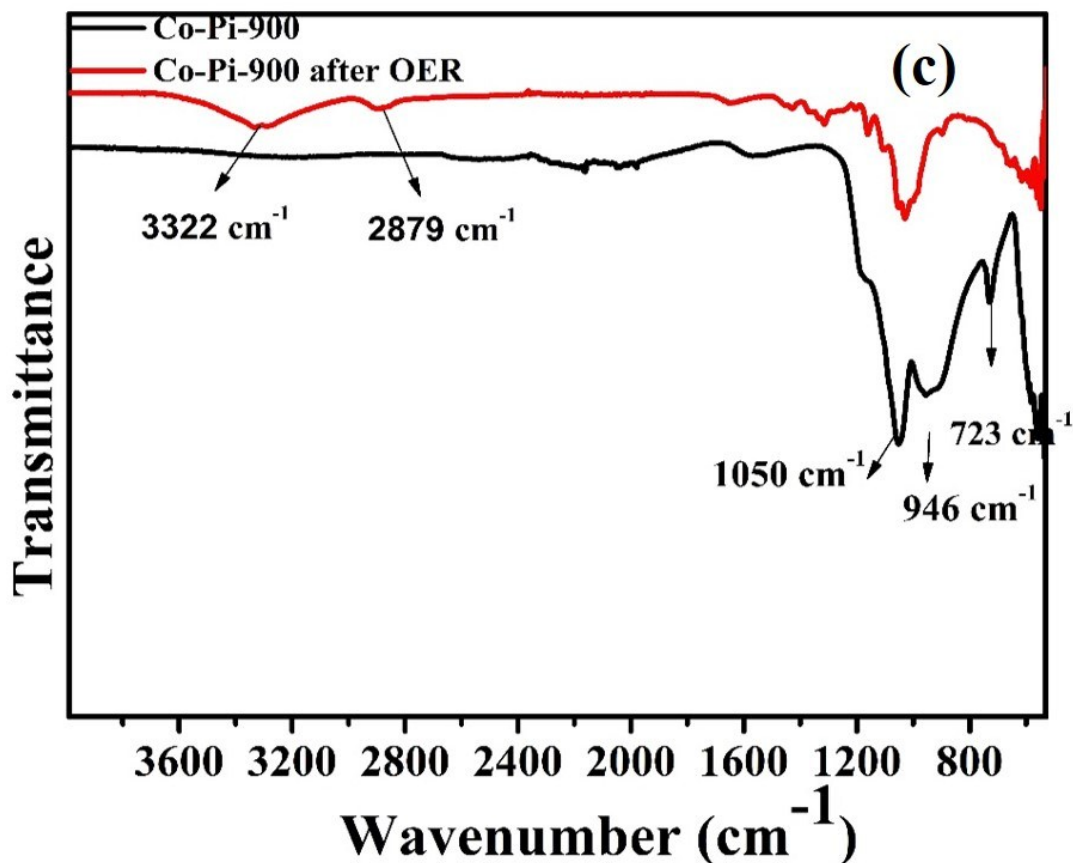

**Figure S12.** (a) EDX, (b) XRD and (c) FTIR of Co-Pi-900 (C,N co-doped Co-Pi-900) after OER test in 1.0 M KOH.

Notes: The post-catalytic sample after OER test was studied to investigate the surface composition of the catalyst (Figure S10-S12). XPS analysis confirms the existence of Co, P, O, N and C on the surface of the post-catalyst after OER test, in addition, the relative intensity of the O1s peak increases, while, the relative intensity of N1s and P1s decrease, indicating the partial transformation from metal phosphate to hydrated oxides or oxyhydroxides. The Co 2p binding energy for Co ions almost no shifts, and a slight shift to lower binding energy for O 1s is observed, while the P1s showed a slight shift to higher binding energy, which might be attributed to the formation of hydrated oxides or oxyhydroxides in the surface of amorphous post-catalyst after the

OER test. Pores also could be clearly observed in TEM micrographs of the sample (light areas marked as red circles on Figure S11a). The SEM of the post-catalytic sample after OER test (Figure S11b) shows that the sample displayed slight aggregation compared with that of pristine catalyst, in addition, the nanosheets after OER test are slightly rougher than that of the catalyst before OER test. The FTIR spectra of Co-Pi-900 and Co-Pi-900 after OER test were shown in Figure S11c. The characteristic peak at  $1050\text{ cm}^{-1}$  for both samples corresponds to characteristic vibration of phosphate groups. The new broad vibration peak at  $3322\text{ cm}^{-1}$  and  $2879\text{ cm}^{-1}$  indicate the appearance of adsorbed  $\text{OH}^-$  groups in the post-catalyst. EDX analysis (Figure S12a) exhibits the regular distribution of Co, P, O, N and C, notably, only small amount of N and C on the surface of the catalyst, and compared with EDX of the pristine sample, the molar ratio of Co/P/O of the post-catalytic sample is 1.0:0.85:1.12, indicating the partial loss of P atoms, in accordance with XPS and FTIR results. The XRD pattern after OER test shows still no diffraction peaks, suggesting it was still amorphous structure. Combining these results, the electrocatalyst after OER test has been partially transformed into hydrated oxides or oxyhydroxides in 1.0 KOH, the active material on the surface of Co-Pi-900 possibly was mainly the mixture of cobalt hydroxide and cobalt phosphate.

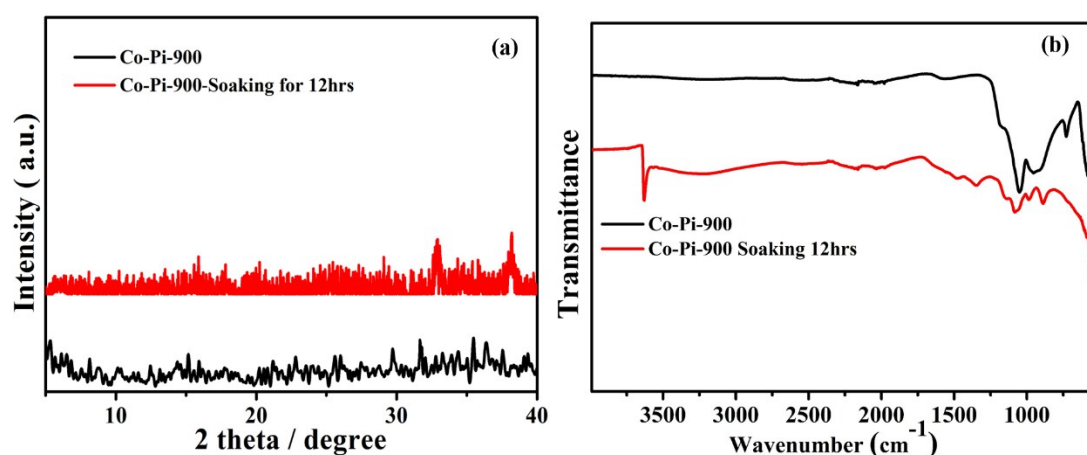

**Figure S13.** (a) XRD, (b) FTIR of Co-Pi-900 and Co-Pi-900 (C,N co-doped Co-Pi-900) soaking for 12hrs.

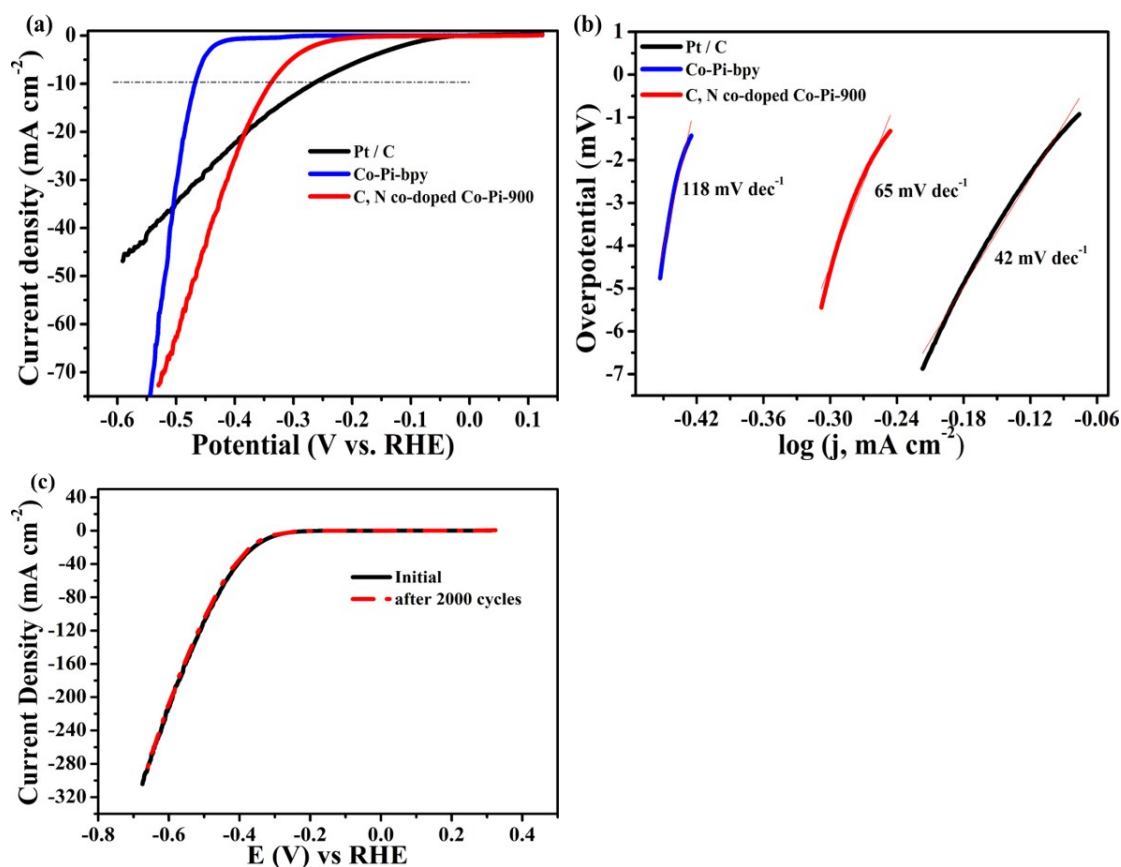

**Figure S14.** (a) HER polarization curve of Co-Pi-900 (C,N co-doped Co-Pi-900), sweep rate:  $5 \text{ mV s}^{-1}$  in 1 M KOH. Pt/C, Co-Pi-bpy are also added for comparison. (b) Corresponding Tafel plots of the samples shown in (a). (c) Durability test for the Co-Pi-900 (C,N co-doped Co-Pi-900) sample. Pt/C (commercial Pt/C, 5% Pt) was compared as a reference.



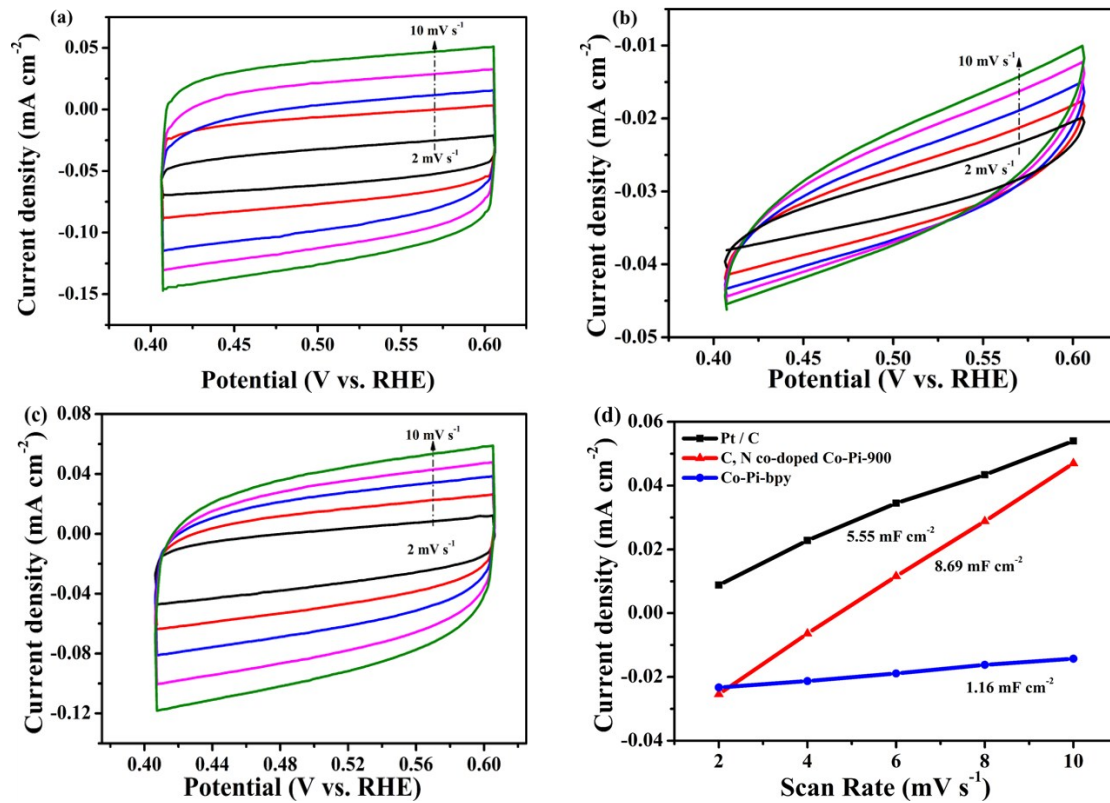

**Figure S15.** Cyclic voltammograms of (a) Co-Pi-900 (C,N co-doped Co-Pi-900), (b) Co-Pi-bpy, (c) IrO<sub>2</sub> at different scan rates from 2 to 10 mV s<sup>-1</sup>. (d) Plots of the current density at 0.57 V vs. the scan rate for different catalyst. All experiments were carried out in 1.0 M KOH.

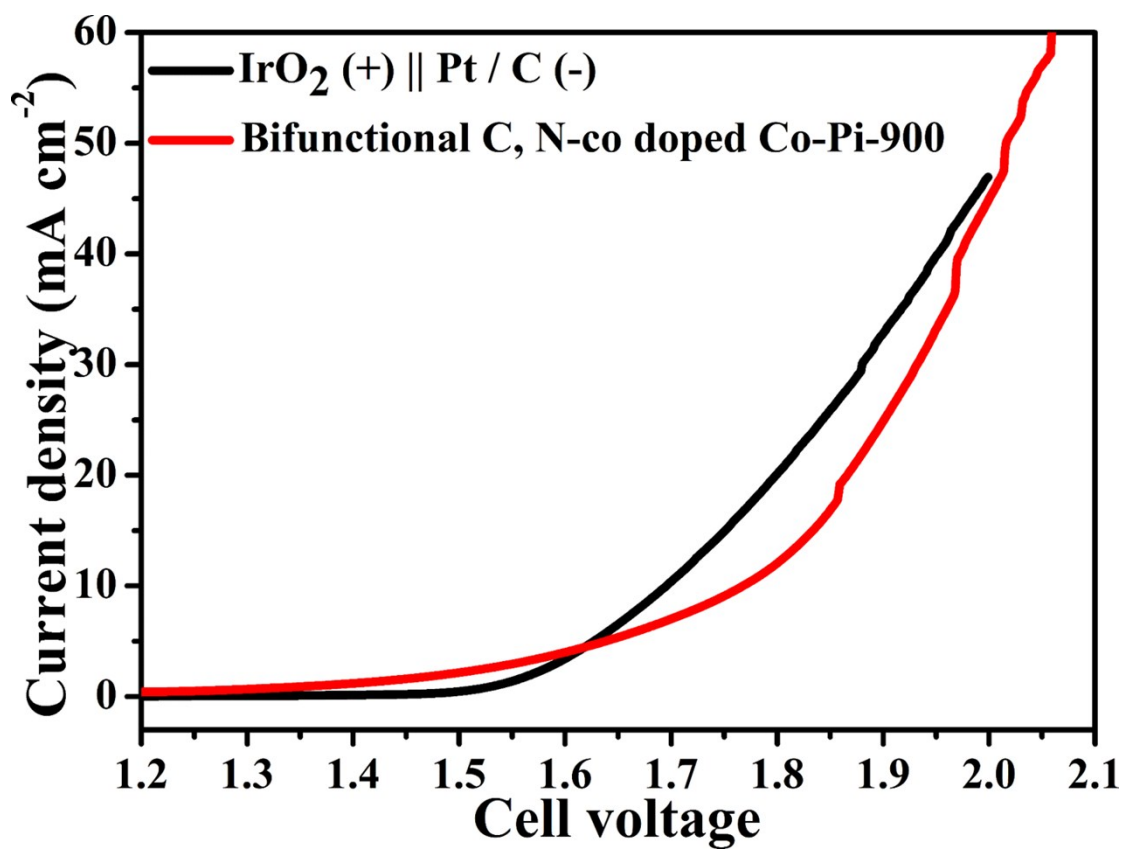

**Figure S16.** (a) Polarization curve for overall water splitting with the Co-Pi-900 (C,N co-doped Co-Pi-900) electrode as both the anode and cathode.
